# Supplementary material for: Adolescents’ media usage and self-reported exposure to advertising across six countries: implications for less healthy food and beverage marketing
Source: PubMed Central journal article supplement — BMJ Open. 2022 May 19;12(5):e058913. doi: 10.1136/bmjopen-2021-058913 (PMC9121490; doi:10.1136/bmjopen-2021-058913), 2022-05-19
Supplement: bmjopen-2021-058913supp001.pdf [file bmjopen-2021-058913supp001.pdf]

## SUPPLEMENTARY MATERIAL – DEMERS-POTVIN ET AL.

Adolescents' media usage and self-reported exposure to advertising across six countries: implications for less healthy food and beverage marketing

**Supplementary Table S1.** Estimates from separate linear regression models examining the amount of self-reported exposure to screen-based media (in minutes) on a weekend day among adolescents in six countries (n=9171).

| Parameter                                               | Weekend day screen time |                        |
|---------------------------------------------------------|-------------------------|------------------------|
|                                                         | Wald $\chi^2$           | B (CI)                 |
| <b>Country</b>                                          | 47.0*                   |                        |
| AUS vs. CAN                                             |                         | -6.8 (-35.7,22.0)      |
| AUS vs. CHILE                                           |                         | -136.9 (-173.8,-100.0) |
| AUS vs. MEX                                             |                         | -130.0 (-165.4,-94.7)  |
| AUS vs. UK                                              |                         | -26.7 (-60.8,7.4)      |
| AUS vs. USA                                             |                         | -85.6 (-120.1,-51.1)   |
| CAN vs. CHILE                                           |                         | -130.1 (-161.3,-98.8)  |
| CAN vs. MEX                                             |                         | -123.2 (-152.1, -94.2) |
| CAN vs. UK                                              |                         | -19.8 (-48.7,9.0)      |
| CAN vs. USA                                             |                         | -78.8 (-107.0,-50.6)   |
| CHILE vs. MEX                                           |                         | 6.9 (-29.7,43.5)       |
| CHILE vs. UK                                            |                         | 110.2 (73.4,147.1)     |
| CHILE vs. USA                                           |                         | 51.3 (14.5,88.1)       |
| MEX vs. UK                                              |                         | 103.3 (68.2,138.5)     |
| MEX vs. USA                                             |                         | 44.4 (9.6,79.2)        |
| UK vs. USA                                              |                         | -58.9 (-93.8,-24.1)    |
| <b>Sex</b>                                              | 15.0*                   |                        |
| Female vs. male                                         |                         | -27.0 (-44.9,-9.0)     |
| <b>Age</b>                                              | 167.5*                  |                        |
| 10-13 years vs. 14-17 years                             |                         | -90.3 (-108.3,-72.4)   |
| <b>Ethnicity</b>                                        | 13.0*                   |                        |
| Majority vs. minority                                   |                         | -32.9 (-56.3,-9.4)     |
| <b>Perceived income adequacy</b>                        | 32.0*                   |                        |
| Adequate vs. inadequate                                 |                         | -47.2 (-68.8,-25.7)    |
| <b>School grades</b>                                    | 30.7*                   |                        |
| High vs. low                                            |                         | -79.7 (-106.7,-52.6)   |
| High vs. mid                                            |                         | -35.8 (-55.6,-16.1)    |
| Low vs. mid                                             |                         | 43.8 (16.9,70.7)       |
| <b>BMI</b>                                              | 10.7*                   |                        |
| Not reported vs. Obesity                                |                         | -66.2 (-100.0,-32.4)   |
| Not reported vs. Overweight                             |                         | -20.6 (-48.6,7.4)      |
| Not reported vs. Severe thinness/thinness/normal weight |                         | -2.0 (-25.2,21.1)      |
| Obesity vs. Overweight                                  |                         | 45.6 (10.8,80.4)       |
| Obesity vs. Severe thinness/thinness/normal weight      |                         | 64.2 (32.9,95.5)       |
| Overweight vs. Severe thinness/thinness/normal weight   |                         | 18.6 (-5.9,43.0)       |

\* : Indicates significant Wald  $\chi^2$  test.

**Notes** : The variable listed second is the reference variable.

**Abbreviations** : AUS=Australia, CAN=Canada, MEX=Mexico, UK=United Kingdom, USA=United States of America; B=Beta; CI = 99% confidence interval.

## SUPPLEMENTARY MATERIAL – DEMERS-POTVIN ET AL.

## Adolescents' media usage and self-reported exposure to advertising across six countries: implications for less healthy food and beverage marketing

**Supplementary Table S2.** Estimates from separate logistic regression models examining daily self-reported exposure to sugary beverage and fast food advertisements among adolescents in six countries on a weekend day (n=9171).

| Parameter                                               | Daily exposure to sugary drinks ads |                  | Daily exposure to fast food ads |                  |
|---------------------------------------------------------|-------------------------------------|------------------|---------------------------------|------------------|
|                                                         | Wald $\chi^2$                       | Odds ratio (CI)  | Wald $\chi^2$                   | Odds ratio (CI)  |
| <b>Country</b>                                          | 70.2*                               |                  | 24.8*                           |                  |
| AUS vs. CAN                                             |                                     | 0.88 (0.69,1.13) |                                 | 0.88 (0.72,1.09) |
| AUS vs. CHILE                                           |                                     | 0.37 (0.28,0.49) |                                 | 1.11 (0.86,1.44) |
| AUS vs. MEX                                             |                                     | 0.29 (0.22,0.39) |                                 | 0.91 (0.71,1.17) |
| AUS vs. UK                                              |                                     | 1.78 (1.26,2.52) |                                 | 2.02 (1.54,2.65) |
| AUS vs. USA                                             |                                     | 0.61 (0.47,0.81) |                                 | 0.66 (0.52,0.84) |
| CAN vs. CHILE                                           |                                     | 0.42 (0.33,0.52) |                                 | 1.26 (1.01,1.57) |
| CAN vs. MEX                                             |                                     | 0.33 (0.27,0.41) |                                 | 1.03 (0.84,1.27) |
| CAN vs. UK                                              |                                     | 2.02 (1.49,2.75) |                                 | 2.29 (1.80,2.90) |
| CAN vs. USA                                             |                                     | 0.70 (0.56,0.86) |                                 | 0.75 (0.62,0.91) |
| CHILE vs. MEX                                           |                                     | 0.80 (0.63,1.02) |                                 | 0.82 (0.64,1.05) |
| CHILE vs. UK                                            |                                     | 4.86 (3.50,6.76) |                                 | 1.81 (1.37,2.40) |
| CHILE vs. USA                                           |                                     | 1.67 (1.30,2.15) |                                 | 0.59 (0.47,0.76) |
| MEX vs. UK                                              |                                     | 6.08 (4.40,8.40) |                                 | 2.22 (1.68,2.92) |
| MEX vs. USA                                             |                                     | 2.09 (1.64,2.66) |                                 | 0.73 (0.58,0.92) |
| UK vs. USA                                              |                                     | 0.34 (0.25,0.48) |                                 | 0.33 (0.25,0.43) |
| <b>Sex</b>                                              | 1.3                                 |                  | 0.3                             |                  |
| Female vs. male                                         |                                     | 1.07 (0.92,1.23) |                                 | 1.03 (0.91,1.17) |
| <b>Age</b>                                              | 0.0                                 |                  | 0.7                             |                  |
| 10-13 years vs. 14-17 years                             |                                     | 1.01 (0.87,1.17) |                                 | 0.96 (0.84,1.09) |
| <b>Ethnicity</b>                                        | 0.0                                 |                  | 0.0                             |                  |
| Majority vs. minority                                   |                                     | 1.02 (0.85,1.23) |                                 | 1.00 (0.85,1.18) |
| <b>Perceived income adequacy</b>                        | 0.5                                 |                  | 3.1                             |                  |
| Adequate vs. inadequate                                 |                                     | 0.95 (0.81,1.13) |                                 | 0.90 (0.78,1.05) |
| <b>School grades</b>                                    | 0.1                                 |                  | 2.7                             |                  |
| High vs. low                                            |                                     | 0.96 (0.77,1.20) |                                 | 0.98 (0.81,1.19) |
| High vs. mid                                            |                                     | 0.98 (0.84,1.15) |                                 | 0.89 (0.77,1.02) |
| Low vs. mid                                             |                                     | 1.02 (0.81,1.27) |                                 | 0.90 (0.74,1.09) |
| <b>BMI</b>                                              | 6.3*                                |                  | 6.0*                            |                  |
| Not reported vs. Obesity                                |                                     | 0.74 (0.57,0.96) |                                 | 0.76 (0.60,0.96) |
| Not reported vs. Overweight                             |                                     | 0.70 (0.56,0.87) |                                 | 0.75 (0.61,0.92) |
| Not reported vs. Severe thinness/thinness/normal weight |                                     | 0.81 (0.66,0.98) |                                 | 0.79 (0.67,0.94) |
| Obesity vs. Overweight                                  |                                     | 0.94 (0.72,1.23) |                                 | 0.99 (0.78,1.26) |
| Obesity vs. Severe thinness/thinness/normal weight      |                                     | 1.09 (0.86,1.38) |                                 | 1.05 (0.85,1.30) |
| Overweight vs. Severe thinness/thinness/normal weight   |                                     | 1.16 (0.96,1.40) |                                 | 1.06 (0.89,1.27) |
| <b>Exposure to screen based media (weekend day)</b>     | 128.7*                              | 1.06 (1.05,1.08) | 186.5*                          | 1.07 (1.06,1.08) |

\* : Indicates significant Wald  $\chi^2$  test.**Notes :** The variable listed second is the reference variable. Exposure to screen based media is expressed in minutes.**Abbreviations :** AUS=Australia, CAN=Canada, MEX=Mexico, UK=United Kingdom, USA=United States of America; CI = 99% confidence interval.

**SUPPLEMENTARY MATERIAL – DEMERS-POTVIN ET AL.**

Adolescents' media usage and self-reported exposure to advertising across six countries: implications for less healthy food and beverage marketing

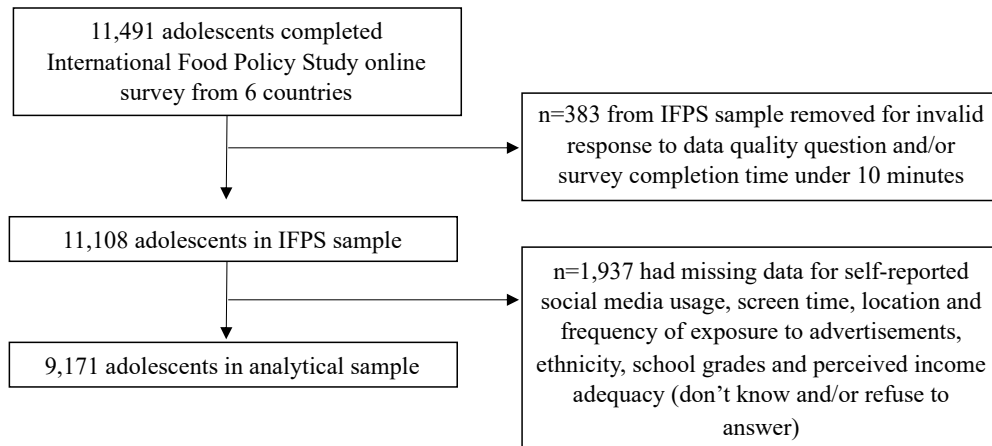

**Supplementary Figure S1.** Flow chart of participants included in the analytical sample.

**SUPPLEMENTARY MATERIAL – DEMERS-POTVIN ET AL.**

Adolescents' media usage and self-reported exposure to advertising across six countries: implications for less healthy food and beverage marketing

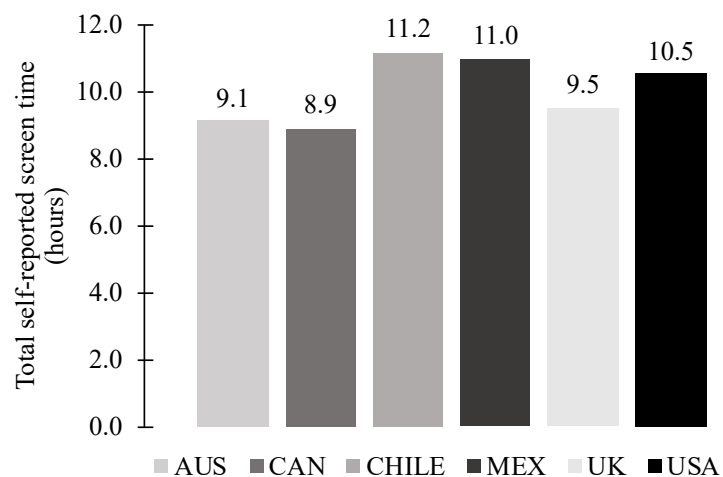

**Supplementary Figure S2.** Mean hours of total self-reported screen time (including YouTube, social media, television, playing games and browsing) on a weekend day among adolescents in six countries after winsorization (n=9171).

Abbreviations : AUS = Australia, CAN = Canada, MEX = Mexico, UK = United Kingdom, USA = United States of America.

## SUPPLEMENTARY MATERIAL – DEMERS-POTVIN ET AL.

Adolescents' media usage and self-reported exposure to advertising across six countries: implications for less healthy food and beverage marketing

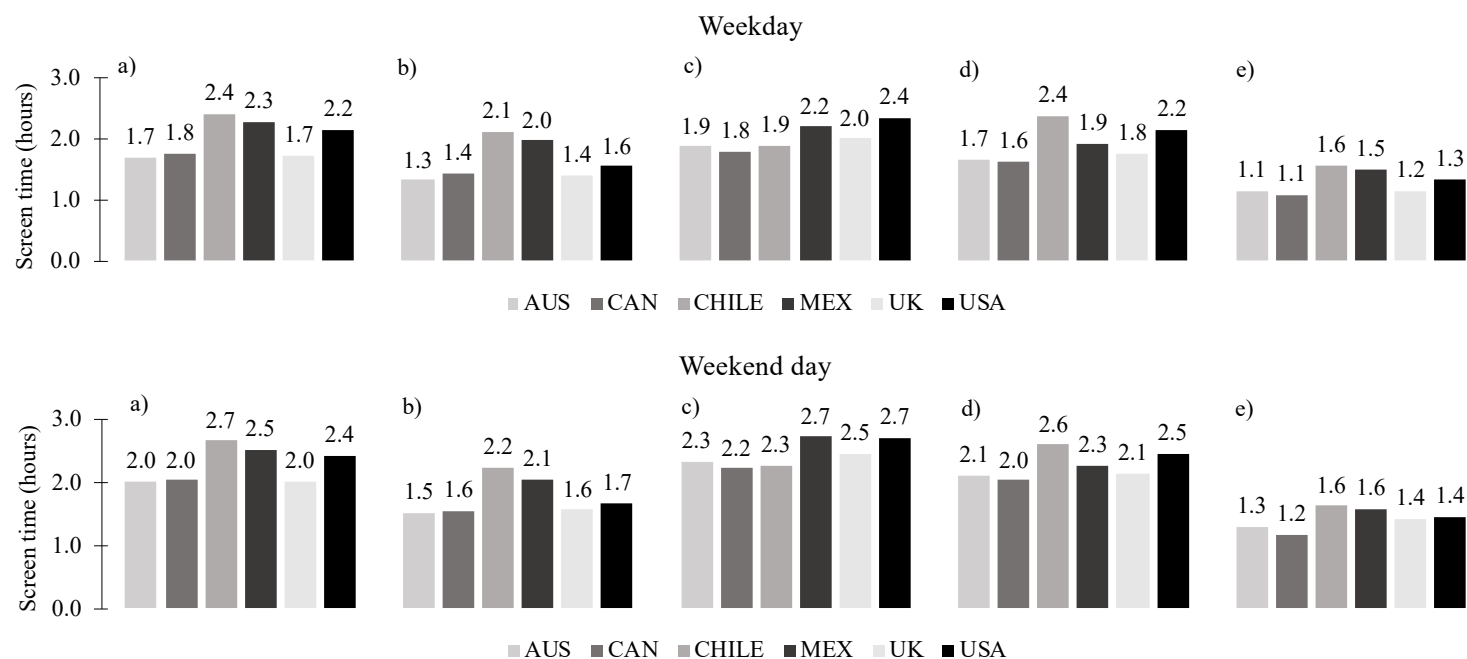

**Supplementary Figure S3.** Mean amount of self-reported screen time (in hours) for five media channels on a weekday (above) and weekend day (below) among adolescents in six countries before winsorization (n=9171).

- a) Watching YouTube
- b) On social media (including messaging, posting, or liking posts)
- c) Watching TV shows, series, or movies
- d) Playing games on smartphones, computers, or game consoles
- e) Browsing, reading websites, Googling, etc.

Abbreviations : AUS = Australia, CAN = Canada, MEX = Mexico, UK = United Kingdom, USA = United States of America.

## SUPPLEMENTARY MATERIAL – DEMERS-POTVIN ET AL.

Adolescents' media usage and self-reported exposure to advertising across six countries: implications for less healthy food and beverage marketing

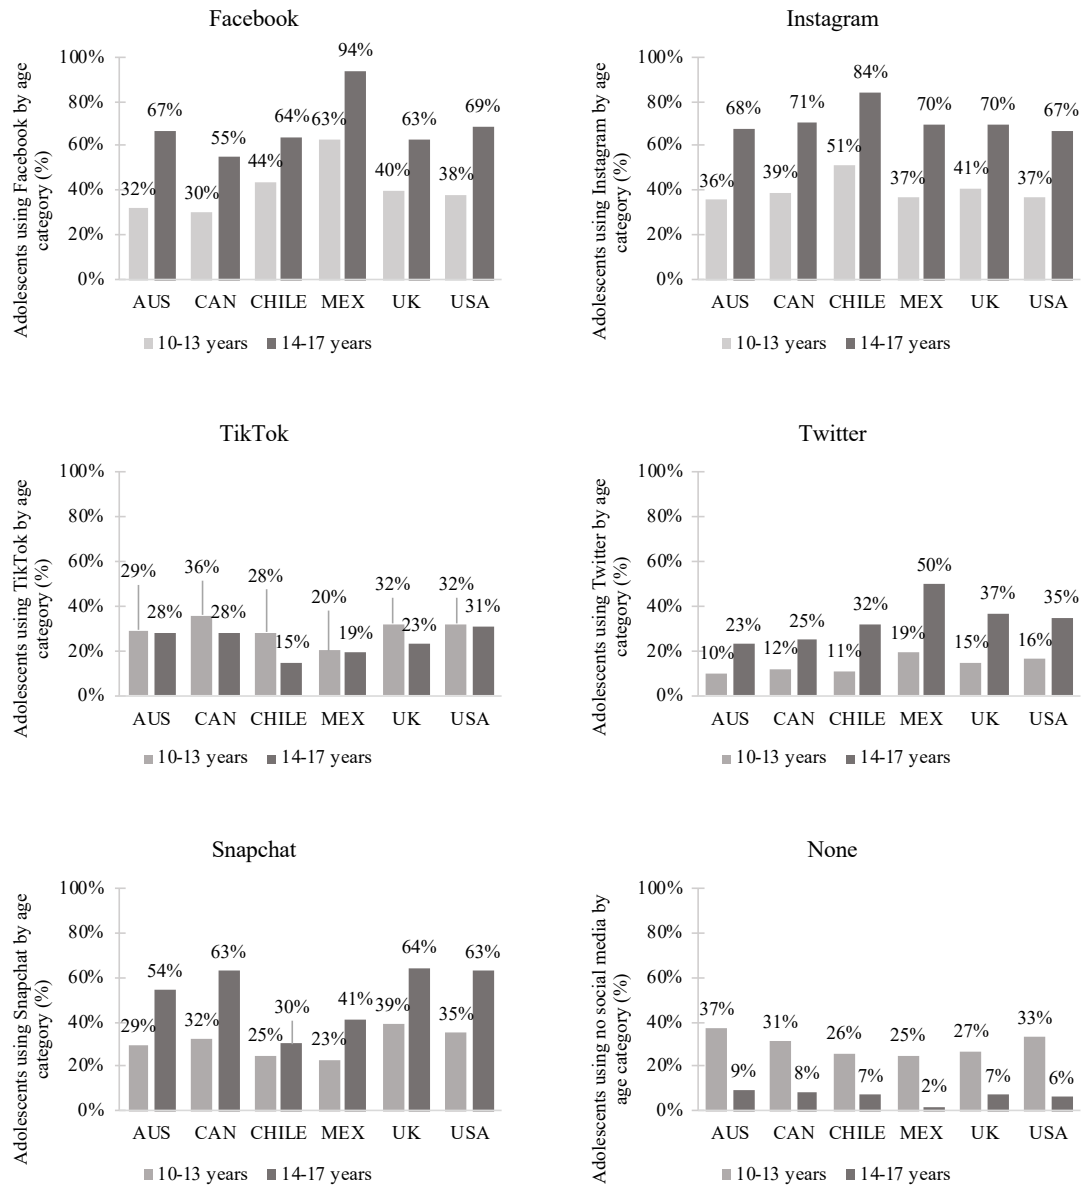

**Supplementary Figure S4.** Percentage of adolescents in six countries self-reporting using platforms of social media (Facebook; Instagram; TikTok; Twitter; Snapchat; None) by age category (n=9171).

Abbreviations : AUS = Australia, CAN = Canada, MEX = Mexico, UK = United Kingdom, USA = United States of America.

**SUPPLEMENTARY MATERIAL – DEMERS-POTVIN ET AL.**

Adolescents' media usage and self-reported exposure to advertising across six countries: implications for less healthy food and beverage marketing

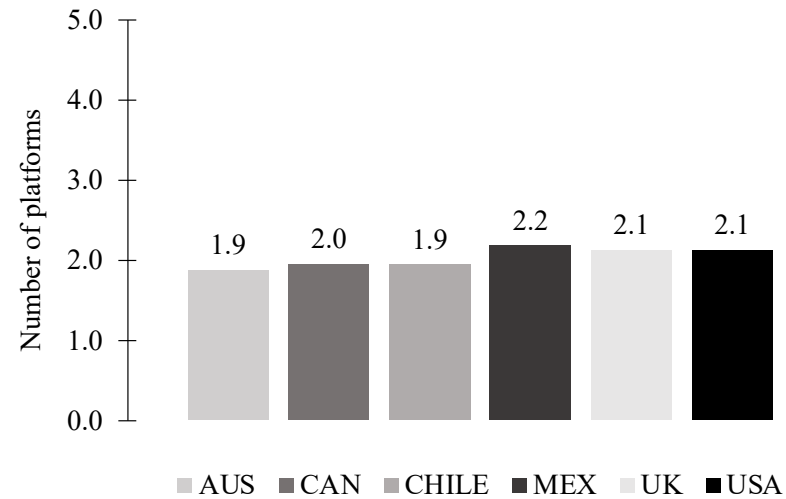

**Supplementary Figure S5.** Mean number of social media platforms self-reported being used among adolescents in six countries (n=9171) <sup>a</sup>.

Abbreviations : AUS = Australia, CAN = Canada, MEX = Mexico, UK = United Kingdom, USA = United States of America.

<sup>a</sup> Range of 0 to 5 possible social media platforms.
